# Supplementary material
Source: Springer Nature journal article supplement (https://www.springermedizin.de/resource/supplementary/13256_2011_1707_MOESM5_ESM.pdf/9648290)

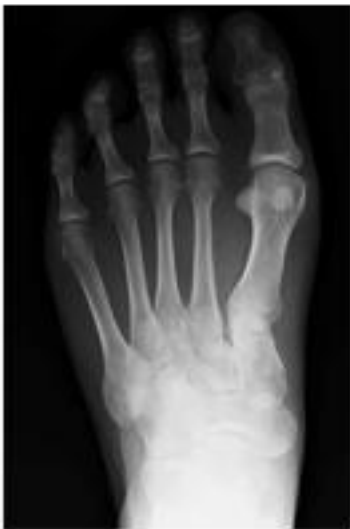

L

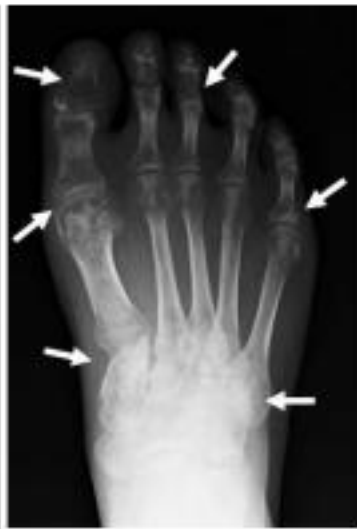

R

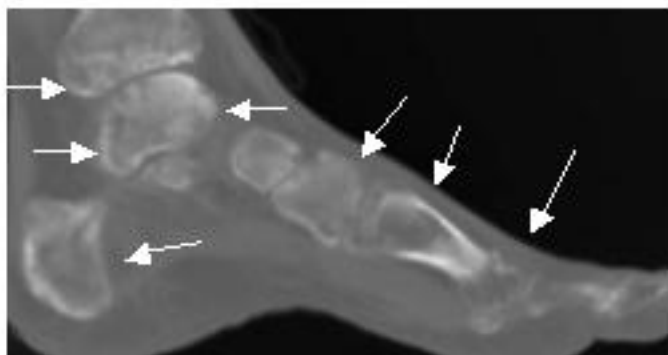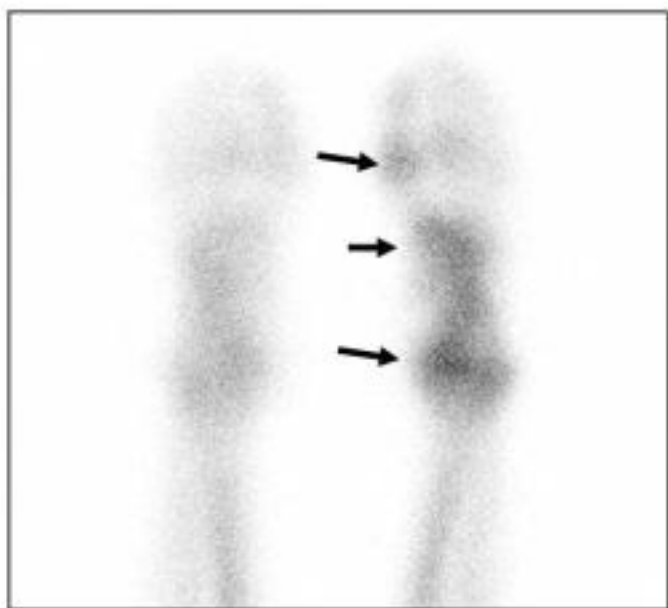

L

R

Supplement: MOESM5 [file 9648290]
